# Supplementary material for: A strategy to study pathway cross-talks of cells under repetitive exposure to stimuli
Source: PubMed Central journal article supplement (PMC3524319; doi:10.1186/1752-0509-6-s3-s6), 2012-12-17

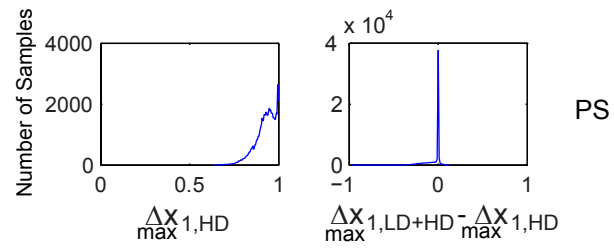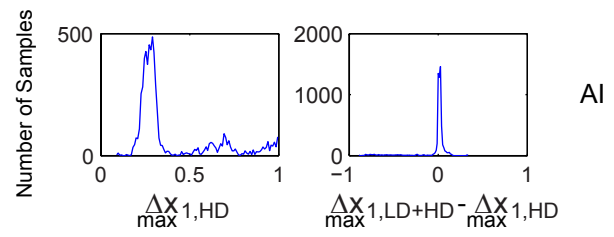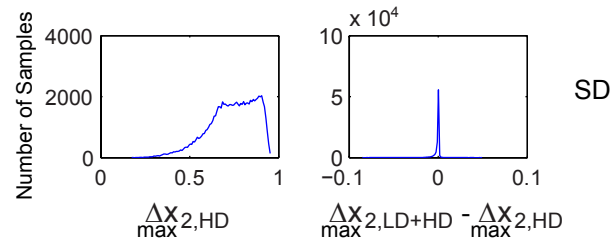

Supplement: 1752-0509-6-S3-S6-S1.pdf [file 1752-0509-6-S3-S6-S1.pdf]
