# Supplementary material for: A strategy to study pathway cross-talks of cells under repetitive exposure to stimuli
Source: PubMed Central journal article supplement (PMC3524319; doi:10.1186/1752-0509-6-s3-s6), 2012-12-17
Supplement: 1752-0509-6-S3-S6-S2.pdf [file 1752-0509-6-S3-S6-S2.pdf]

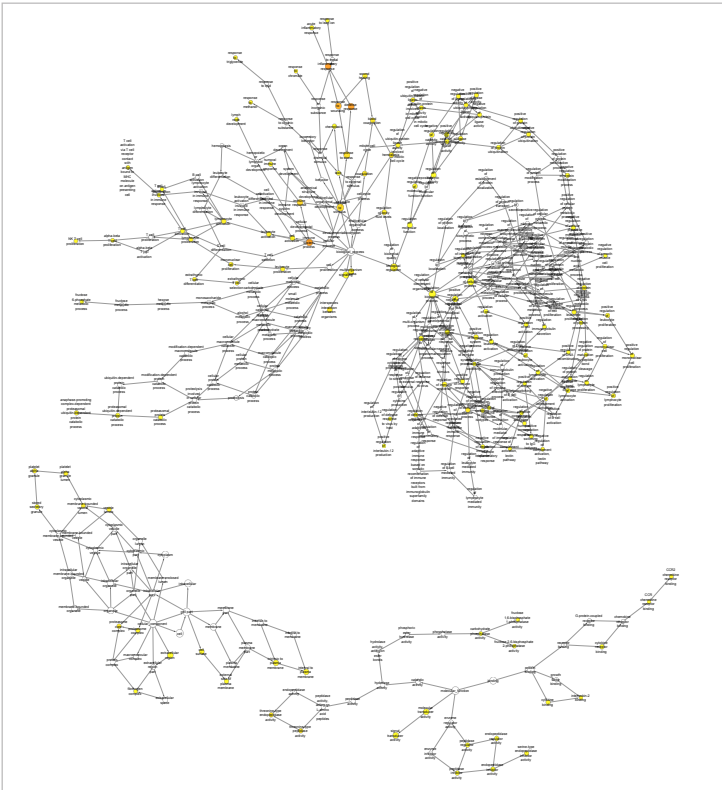

Low dose induced cellular function (top 10)

|                                       |
|---------------------------------------|
| inflammatory response                 |
| defense response                      |
| immune system process                 |
| response to wounding                  |
| immune response                       |
| response to stimulus                  |
| response to stress                    |
| blood coagulation                     |
| coagulation                           |
| regulation of immune effector process |

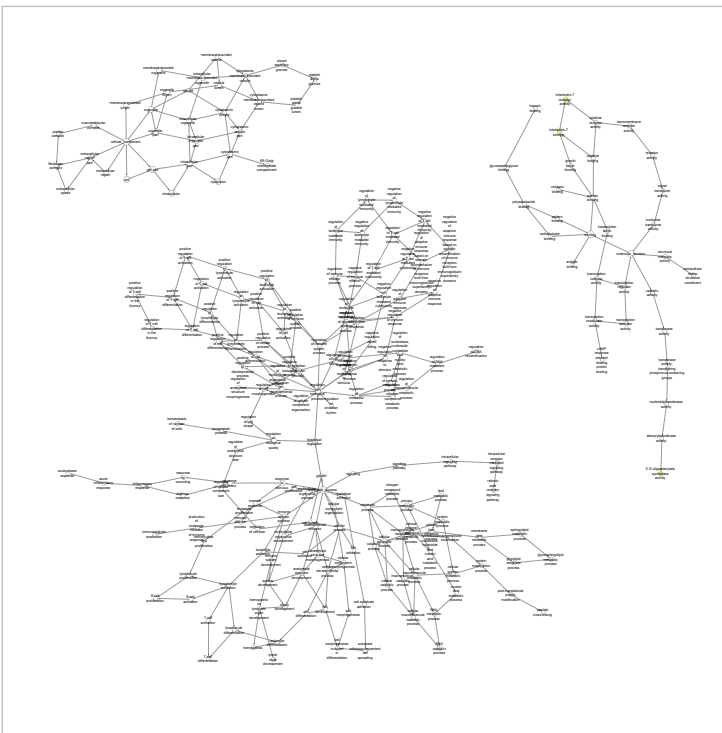

Low dose reduced cellular function (top 10)

|                                                             |
|-------------------------------------------------------------|
| IL7 receptor activity                                       |
| IL7 binding                                                 |
| 2'-5'-oligoadenylate synthetase activity                    |
| negative regulation of T cell mediated cytotoxicity         |
| positive regulation of T cell differentiation in the thymus |
| cAMP response element binding protein binding               |
| negative regulation of leukocyte mediated cytotoxicity      |
| negative regulation of T cell mediated immunity             |
| negative regulation of cell killing                         |
| fibrinogen complex                                          |
