# Supplementary material for: A strategy to study pathway cross-talks of cells under repetitive exposure to stimuli
Source: PubMed Central journal article supplement (PMC3524319; doi:10.1186/1752-0509-6-s3-s6), 2012-12-17
Supplement: 1752-0509-6-S3-S6-S3.pdf [file 1752-0509-6-S3-S6-S3.pdf]

Additional file 3 Biochemical reactions and Parameters for the computational model (adapted from [1])

| Biochemical reactions                                                                                                            | Parameters             | Notes                                                             |
|----------------------------------------------------------------------------------------------------------------------------------|------------------------|-------------------------------------------------------------------|
| [R]+[JAK]↔[RJ]                                                                                                                   | k1=100                 | Adapted from Yamada's model [1].                                  |
|                                                                                                                                  | k_1=0.05               |                                                                   |
| [IFN-γ]+[RJ] ↔ [IFNRJ]                                                                                                           | k2=20                  |                                                                   |
|                                                                                                                                  | k_2=0.02               |                                                                   |
| 2[IFNRJ] ↔ [IFNRJ2]                                                                                                              | k3=40                  |                                                                   |
|                                                                                                                                  | k_3=0.2                |                                                                   |
| [IFNRJ2]→[IFNRJ2*]                                                                                                               | k4=0.005               |                                                                   |
| [IFNRJ2*]+[STAT1c] ↔ [IFNRJ2*-STAT1c]                                                                                            | k5=8                   |                                                                   |
|                                                                                                                                  | k_5=0.8                |                                                                   |
| [IFNRJ2*-STAT1c]→[IFNRJ2*]+[STAT1c*]                                                                                             | k6=0.4                 |                                                                   |
| [IFNRJ2*]+[STAT1c*]↔[IFNRJ2*-STAT1c*]                                                                                            | k7=5                   |                                                                   |
|                                                                                                                                  | k_7=0.5                |                                                                   |
| 2[STAT1c*]↔[STAT1c*-STAT1c*]                                                                                                     | k8=20                  |                                                                   |
|                                                                                                                                  | k_8=0.1                |                                                                   |
| [IFNRJ2*]+[SHP-2] ↔ [IFNRJ2*-SHP-2]                                                                                              | k9=1                   |                                                                   |
|                                                                                                                                  | k_9=0.2                |                                                                   |
| [IFNRJ2*-SHP-2]→[IFNRJ2]+[SHP-2]                                                                                                 | k10=0.003              |                                                                   |
| [PPX]+[STAT1c*]↔[PPX-STAT1c*]                                                                                                    | k11=1                  |                                                                   |
|                                                                                                                                  | k_11=0.2               |                                                                   |
| [PPX-STAT1c*]→[PPX]+[STAT1c]                                                                                                     | k12=0.003              |                                                                   |
| [PPX]+[STAT1c*-STAT1c*]↔[PPX-STAT1c*-STAT1c*]                                                                                    | k11=1                  |                                                                   |
|                                                                                                                                  | k_11=0.2               |                                                                   |
| [PPX-STAT1c*-STAT1c*]→[PPX]+[STAT1c-STAT1c*]                                                                                     | k12=0.003              |                                                                   |
| [STAT1c]+[STAT1c*]↔[STAT1c-STAT1c*]                                                                                              | k13=0.0002             |                                                                   |
|                                                                                                                                  | k_13=0.2               |                                                                   |
| [STAT1c*-STAT1c*]→[STAT1n*-STAT1n*]                                                                                              | k14 =0.005             |                                                                   |
| 2[STAT1n*]↔[STAT1n*-STAT1n*]                                                                                                     | k7=5                   |                                                                   |
|                                                                                                                                  | k_7=0.5                |                                                                   |
| [PPN]+[STAT1n*]↔[PPN-STAT1n*]                                                                                                    | k15 =1                 |                                                                   |
|                                                                                                                                  | k_15 = 0.2             |                                                                   |
| [PPN-STAT1n*]→[PPN]+[STAT1n]                                                                                                     | k16 =0.005             |                                                                   |
| [PPN]+[STAT1n*-STAT1n*]↔[PPN-STAT1n*-STAT1n*]                                                                                    | k15 =1                 |                                                                   |
|                                                                                                                                  | k_15 = 0.2             |                                                                   |
| [PPN-STAT1n*-STAT1n*]→[PPN]+[STAT1n-STAT1n*]                                                                                     | k16 =0.005             |                                                                   |
| [STAT1n]+[STAT1n*]↔[STAT1n-STAT1n*]                                                                                              | k13=0.0002             |                                                                   |
|                                                                                                                                  | k_13=0.2               |                                                                   |
| [STAT1n]→[STAT1c]                                                                                                                | k17 =0.05              |                                                                   |
| $d[\text{SOCS1\_mRNA}]/dt = k_{18} + k_{18a}[\text{STAT1n}^* - \text{STAT1n}^*]/(k_{18b} + [\text{STAT1n}^* - \text{STAT1n}^*])$ | k18=1×10 <sup>-9</sup> | Basal transcription rate of SOCS mRNA, fitted.                    |
|                                                                                                                                  | k18a = 0.002 nM/s      | Maximal SOCS1 mRNA transcription rate activated by STAT1, fitted. |
|                                                                                                                                  | k18b = 400 nM          |                                                                   |
| [SOCS1_mRNA]→[SOCS1_mRNAc]                                                                                                       | k19 = 0.001            | Adapted from Yamada's model [1].                                  |
| $d[\text{SOCS1}]/dt = k_{20}[\text{SOCS1\_mRNAc}]$                                                                               | k20 = 0.01             |                                                                   |
| [SOCS1]+[IFNRJ2*]↔[SOCS1-IFNRJ2*]                                                                                                | k21=20                 |                                                                   |
|                                                                                                                                  | k_21=0.1               |                                                                   |

Additional file 3 (Cont'd)

| Biochemical reactions                                                                                                                              | Parameters                                | Notes                                                     |
|----------------------------------------------------------------------------------------------------------------------------------------------------|-------------------------------------------|-----------------------------------------------------------|
| $d[\text{SOCS1\_mRNA}]/dt = -k_{22}[\text{SOCS1\_mRNA}]$                                                                                           | $k_{22} = 0.0008$                         | SOCS1 mRNA degradation rate, fitted.                      |
| $d[\text{SOCS1}]/dt = -k_{23}[\text{SOCS1}]$                                                                                                       | $k_{23} = 0.00013$                        | SOCS1 has a half-life of 1.5 hours [2].                   |
| $[\text{STAT1c}] + [\text{SOCS1-IFNRJ2}^*] \leftrightarrow [\text{SOCS1-IFNRJ2}^*-\text{STAT1c}]$                                                  | $k_5 = 8$<br>$k_{-5} = 0.8$               | Adapted from Yamada's model [1].                          |
| $[\text{SHP-2}] + [\text{SOCS1-IFNRJ2}^*-\text{STAT1c}] \leftrightarrow [\text{SOCS1-IFNRJ2}^*-\text{STAT1c-SHP-2}]$                               | $k_9 = 1$<br>$k_{-9} = 0.2$               |                                                           |
| $[\text{SOCS1-IFNRJ2}^*-\text{STAT1c-SHP-2}] \rightarrow [\text{SOCS1}] + [\text{IFNRJ2}] + [\text{STAT1c}] + [\text{SHP-2}]$                      | $k_{10} = 0.003$                          |                                                           |
| $[\text{SOCS1-IFNRJ2}^*-\text{STAT1c-SHP-2}] \rightarrow [\text{IFNRJ2}^*-\text{STAT1c-SHP-2}]$                                                    | $k_{23} = 0.00013$                        | SOCS1 has a half-life of 1.5 hours [2].                   |
| $d[X]/dt = k_{24a}[\text{IFN-}\gamma]/(k_{24b} + [\text{IFN-}\gamma]) - k_{24}[X]$                                                                 | $k_{24a} = 5 \times 10^{-6} \text{ nM/s}$ | Maximal X expression rate stimulated by signal, fitted.   |
|                                                                                                                                                    | $k_{24b} = 0.016 \text{ nM}$              | Michaelis-Menten constant, fitted.                        |
|                                                                                                                                                    | $k_{24} = 0.0002$                         | X degradation rate, fitted.                               |
| $d[\text{STAT1\_mRNA}]/dt = k_{25} + k_{25a}[X]/(k_{25b} + [X]) - k_{25}[\text{STAT1\_mRNA}]$                                                      | $k_{25} = 2 \times 10^{-9}$               | STAT1 basal transcription rate, fitted.                   |
|                                                                                                                                                    | $k_{25a} = 8 \times 10^{-4} \text{ nM/s}$ | Maximal STAT1 transcription rate stimulated by X, fitted. |
|                                                                                                                                                    | $k_{25b} = 0.4 \text{ nM}$                | Michaelis-Menten constant, fitted.                        |
|                                                                                                                                                    | $k_{25} = 0.000035$                       | STAT1 mRNA has a half-life of about 7.4 hours [3].        |
| $d[\text{STAT1}]/dt = k_{26}[\text{STAT1\_mRNA}] - k_{26}[\text{STAT1}]$                                                                           | $k_{26} = 0.01$                           | STAT1 translation rate, fitted.                           |
|                                                                                                                                                    | $k_{26} = 0.000012$                       | STAT1 has a half-life of 16 hours [2].                    |
| $d[\text{IRF1\_mRNA}]/dt = k_{27a}[\text{STAT1n}^* - \text{STAT1n}^*]/(k_{27b} + [\text{STAT1n}^* - \text{STAT1n}^*]) - k_{27}[\text{IRF1\_mRNA}]$ | $k_{27a} = 0.004 \text{ nM/s}$            | Fitted                                                    |
|                                                                                                                                                    | $k_{27b} = 400$                           | Fitted                                                    |
|                                                                                                                                                    | $k_{27} = 0.00016$                        | IRF1 mRNA has a half-life of 1.2 hours [3].               |
| $d[\text{IRF1}]/dt = k_{28}[\text{IRF1\_mRNA}] - k_{28}[\text{IRF1}]$                                                                              | $k_{28} = 0.01$                           | Fitted                                                    |
|                                                                                                                                                    | $k_{28} = 0.00038$                        | IRF1 has a half-life of about 30 minutes [4].             |

\*Initial condition:  $[\text{R}] = 12 \text{ nM}$ ,  $[\text{Jak}] = 12 \text{ nM}$ ,  $[\text{SHP-2}] = 100 \text{ nM}$ ,  $[\text{PPX}] = 50 \text{ nM}$  and  $[\text{PPN}] = 60 \text{ nM}$

\* The first and second order rate constants are represented in units of  $\text{second}^{-1}$  and  $10^6 \text{ molar}^{-1} \text{ second}^{-1}$ , respectively.

### Reference

1. Yamada S, Shiono S, Joo A, Yoshimura A: **Control mechanism of JAK/STAT signal transduction pathway.** *FEBS Lett* 2003, **534**:190-196.
2. Siewert E, Muller-Esterl W, Starr R, Heinrich PC, Schaper F: **Different protein turnover of interleukin-6-type cytokine signalling components.** *Eur J Biochem* 1999, **265**:251-257.

3. Sharova LV, Sharov AA, Nedorezov T, Piao Y, Shaik N, Ko MSH: **Database for mRNA Half-Life of 19 977 Genes Obtained by DNA Microarray Analysis of Pluripotent and Differentiating Mouse Embryonic Stem Cells.** *DNA Research* 2009, **16**:45-58.
4. Watanabe N, Sakakibara J, Hovanessian AG, Taniguchi T, Fujita T: **Activation of IFN- $\beta$  element by IRF-1 requires a post-translational event in addition to IRF-1 synthesis.** *Nucleic Acids Res* 1991, **19**:4421-4428.
