# Supplementary material for: A strategy to study pathway cross-talks of cells under repetitive exposure to stimuli
Source: PubMed Central journal article supplement (PMC3524319; doi:10.1186/1752-0509-6-s3-s6), 2012-12-17
Supplement: 1752-0509-6-S3-S6-S4.pdf [file 1752-0509-6-S3-S6-S4.pdf]

Additional file 4 Variables and Ordinary Differentiation Equations of the Computational Model

| Variable Index | Gene-Symbol                | Differentiation equation                                                                                                                                                                                                                                                         |
|----------------|----------------------------|----------------------------------------------------------------------------------------------------------------------------------------------------------------------------------------------------------------------------------------------------------------------------------|
| S              | IFN- $\gamma$              |                                                                                                                                                                                                                                                                                  |
| $x_1$          | R (IFN- $\gamma$ Receptor) | $dx_1 / dt = -k_1 \cdot x_1 \cdot x_2 + k_{-1} \cdot x_3$                                                                                                                                                                                                                        |
| $x_2$          | JAK                        | $dx_2 / dt = -k_1 \cdot x_1 \cdot x_2 + k_{-1} \cdot x_3$                                                                                                                                                                                                                        |
| $x_3$          | RJ                         | $dx_3 / dt = k_1 \cdot x_1 \cdot x_2 - k_{-1} \cdot x_3 - k_2 \cdot S \cdot x_3 + k_{-2} \cdot x_4$                                                                                                                                                                              |
| $x_4$          | IFNRJ                      | $dx_4 / dt = k_2 \cdot S \cdot x_3 - k_{-2} \cdot x_4 - 2 \cdot k_3 \cdot x_4 \cdot x_4 + 2 \cdot k_{-3} \cdot x_5$                                                                                                                                                              |
| $x_5$          | IFNRJ2                     | $dx_5 / dt = k_3 \cdot x_4 \cdot x_4 - k_{-3} \cdot x_5 - k_4 \cdot x_5 + k_{10} \cdot x_{13} + k_{10} \cdot x_{31}$                                                                                                                                                             |
| $x_6$          | IFNRJ2*                    | $dx_6 / dt = k_4 \cdot x_5 - k_5 \cdot x_6 \cdot x_7 + k_{-5} \cdot x_8 + k_6 \cdot x_8 - k_7 \cdot x_6 \cdot x_9 + k_{-7} \cdot x_{10}$<br>$-k_9 \cdot x_6 \cdot x_{12} + k_{-9} \cdot x_{13} - k_{21} \cdot x_{28} \cdot x_6 + k_{-21} \cdot x_{29}$                           |
| $x_7$          | STAT1c                     | $dx_7 / dt = -k_5 \cdot x_6 \cdot x_7 + k_{-5} \cdot x_8 + k_{12} \cdot x_{15} - k_{13} \cdot x_7 \cdot x_9 + k_{-13} \cdot x_{17} + k_{17} \cdot x_{25}$<br>$-k_5 \cdot x_7 \cdot x_{29} + k_{-5} \cdot x_{30} + k_{10} \cdot x_{31} + k_{26} \cdot x_{33} - k_{-26} \cdot x_7$ |
| $x_8$          | IFNRJ2*-STAT1c             | $dx_8 / dt = k_5 \cdot x_6 \cdot x_7 - k_{-5} \cdot x_8 - k_6 \cdot x_8$                                                                                                                                                                                                         |
| $x_9$          | STAT1c*                    | $dx_9 / dt = k_6 \cdot x_8 - k_7 \cdot x_6 \cdot x_9 + k_{-7} \cdot x_{10} - 2 \cdot k_8 \cdot x_9 \cdot x_9 + 2 \cdot k_{-8} \cdot x_{11}$<br>$-k_{11} \cdot x_{14} \cdot x_9 + k_{-11} \cdot x_{15} - k_{13} \cdot x_7 \cdot x_9 + k_{-13} \cdot x_{17}$                       |
| $x_{10}$       | IFNRJ2*-STAT1c*            | $dx_{10} / dt = k_7 \cdot x_6 \cdot x_9 - k_{-7} \cdot x_{10}$                                                                                                                                                                                                                   |
| $x_{11}$       | STAT1c*-STAT1c*            | $dx_{11} / dt = k_8 \cdot x_9 \cdot x_9 - k_{-8} \cdot x_{11} - k_{14} \cdot x_{11} - k_{11} \cdot x_{14} \cdot x_{11} + k_{-11} \cdot x_{16}$                                                                                                                                   |
| $x_{12}$       | SHP-2                      | $dx_{12} / dt = -k_9 \cdot x_6 \cdot x_{12} + k_{-9} \cdot x_{13} + k_{10} \cdot x_{13} - k_9 \cdot x_{12} \cdot x_{30} + k_{-9} \cdot x_{31} + k_{10} \cdot x_{31}$                                                                                                             |
| $x_{13}$       | IFNRJ2*-SHP-2              | $dx_{13} / dt = k_9 \cdot x_6 \cdot x_{12} - k_{-9} \cdot x_{13} - k_{10} \cdot x_{13}$                                                                                                                                                                                          |
| $x_{14}$       | PPX                        | $dx_{14} / dt = -k_{11} \cdot x_{14} \cdot x_9 + k_{-11} \cdot x_{15} + k_{12} \cdot x_{15} - k_{11} \cdot x_{14} \cdot x_{11} + k_{-11} \cdot x_{16} + k_{12} \cdot x_{16}$                                                                                                     |
| $x_{15}$       | PPX-STAT1c*                | $dx_{15} / dt = k_{11} \cdot x_{14} \cdot x_9 - x_{-11} \cdot x_{15} - k_{12} \cdot x_{15}$                                                                                                                                                                                      |
| $x_{16}$       | PPX-STAT1c*-STAT1c*        | $dx_{16} / dt = k_{11} \cdot x_{14} \cdot x_{11} - k_{-11} \cdot x_{16} - k_{12} \cdot x_{16}$                                                                                                                                                                                   |
| $x_{17}$       | STAT1c-STAT1c*             | $dx_{17} / dt = k_{12} \cdot x_{16} + k_{13} \cdot x_7 \cdot x_9 - k_{-13} \cdot x_{17}$                                                                                                                                                                                         |
| $x_{18}$       | STAT1n*                    | $dx_{18} / dt = -2 \cdot k_7 \cdot x_{18} \cdot x_{18} + 2 \cdot k_{-7} \cdot x_{19} - k_{15} \cdot x_{20} \cdot x_{18} + k_{-15} \cdot x_{21} - k_{13} \cdot x_{25} \cdot x_{18}$<br>$+k_{-13} \cdot x_{24}$                                                                    |
| $x_{19}$       | STAT1n*-STAT1n*            | $dx_{19} / dt = k_{14} \cdot x_{11} + k_7 \cdot x_{18} \cdot x_{18} - k_{-7} \cdot x_{19} - k_{15} \cdot x_{20} \cdot x_{19} + k_{-15} \cdot x_{22}$                                                                                                                             |
| $x_{20}$       | PPN                        | $dx_{20} / dt = -k_{15} \cdot x_{20} \cdot x_{18} + k_{-15} \cdot x_{21} + k_{16} \cdot x_{21} - k_{15} \cdot x_{20} \cdot x_{19} + k_{-15} \cdot x_{22} + k_{16} \cdot x_{22}$                                                                                                  |
| $x_{21}$       | PPN-STAT1n*                | $dx_{21} / dt = k_{15} \cdot x_{20} \cdot x_{18} - k_{-15} \cdot x_{21} - k_{16} \cdot x_{21}$                                                                                                                                                                                   |
| $x_{22}$       | PPN-STAT1n*-STAT1n*        | $dx_{22} / dt = k_{15} \cdot x_{20} \cdot x_{19} - k_{-15} \cdot x_{22} - k_{16} \cdot x_{22}$                                                                                                                                                                                   |
| $x_{23}$       | STAT1n-STAT1n              | $dx_{23} / dt = 0$                                                                                                                                                                                                                                                               |
| $x_{24}$       | STAT1n-STAT1n*             | $dx_{24} / dt = k_{16} \cdot x_{22} + k_{13} \cdot x_{25} \cdot x_{18} - k_{-13} \cdot x_{24}$                                                                                                                                                                                   |
| $x_{25}$       | STAT1n                     | $dx_{25} / dt = -k_{13} \cdot x_{25} \cdot x_{18} + k_{-13} \cdot x_{24} + k_{16} \cdot x_{21} - k_{17} \cdot x_{25}$                                                                                                                                                            |
| $x_{26}$       | SOCS1_mRNAn                | $dx_{26} / dt = k_{18} + k_{18a} \cdot x_{19} / (k_{18b} + x_{19}) - k_{19} \cdot x_{26}$                                                                                                                                                                                        |
| $x_{27}$       | SOCS1_mRNAc                | $dx_{27} / dt = k_{19} \cdot x_{26} - k_{22} \cdot x_{27}$                                                                                                                                                                                                                       |

---

|          |                                |                                                                                                                                         |
|----------|--------------------------------|-----------------------------------------------------------------------------------------------------------------------------------------|
| $x_{28}$ | SOCS1                          | $dx_{28} / dt = k_{20} \cdot x_{27} - k_{21} \cdot x_{28} \cdot x_6 + k_{-21} \cdot x_{29} - k_{23} \cdot x_{28} + k_{10} \cdot x_{31}$ |
| $x_{29}$ | SOCS1-IFNRJ2*                  | $dx_{29} / dt = k_{21} \cdot x_{28} \cdot x_6 - k_{-21} \cdot x_{29} - k_5 \cdot x_7 \cdot x_{29} + k_{-5} \cdot x_{30}$                |
| $x_{30}$ | SOCS1-IFNRJ2*-<br>STAT1c       | $dx_{30} / dt = k_5 \cdot x_7 \cdot x_{29} - k_{-5} \cdot x_{30} - k_9 \cdot x_{12} \cdot x_{30} + k_{-9} \cdot x_{31}$                 |
| $x_{31}$ | SOCS1-IFNRJ2*-<br>STAT1c-SHP-2 | $dx_{31} / dt = k_9 \cdot x_{12} \cdot x_{30} - k_{-9} \cdot x_{31} - k_{10} \cdot x_{31} - k_{23} \cdot x_{31}$                        |
| $x_{32}$ | IFNRJ2*-STAT1c-SHP-2           | $dx_{32} / dt = k_{23} \cdot x_{31}$                                                                                                    |
| $x_{33}$ | STAT1c_mRNA                    | $dx_{33} / dt = k_{25} + k_{25a} \cdot x_{36} / (k_{25b} + x_{36}) - k_{-25} \cdot x_{33}$                                              |
| $x_{34}$ | IRF1-mRNA                      | $dx_{34} / dt = k_{27a} \cdot x_{19} / (k_{27b} + x_{19}) - k_{-27} \cdot x_{34}$                                                       |
| $x_{35}$ | IRF1                           | $dx_{35} / dt = k_{28} \cdot x_{34} - k_{-28} \cdot x_{35}$                                                                             |
| $x_{36}$ | X                              | $dx_{36} / dt = k_{24a} \cdot S / (k_{24b} + S) - k_{-24} \cdot x_{36}$                                                                 |

---
